# Supplementary material for: LncRNA LINC00963 Promotes Tumorigenesis and Radioresistance in Breast Cancer by Sponging miR-324-3p and Inducing ACK1 Expression
Source: PubMed Central journal article supplement (PMC6881674; doi:10.1016/j.omtn.2019.09.033), 2019-10-22
Supplement: mmc1.pdf [file mmc1.pdf]

OMTN, Volume 18

## **Supplemental Information**

### **LncRNA LINC00963 Promotes Tumorigenesis and Radioresistance in Breast Cancer by Sponging miR-324-3p and Inducing ACK1 Expression**

**Na Zhang, Xue Zeng, Chaonan Sun, Hong Guo, Tianlu Wang, Linlin Wei, Yaotian Zhang, Jiaming Zhao, and Xinchu Ma**

## Supplementary Data

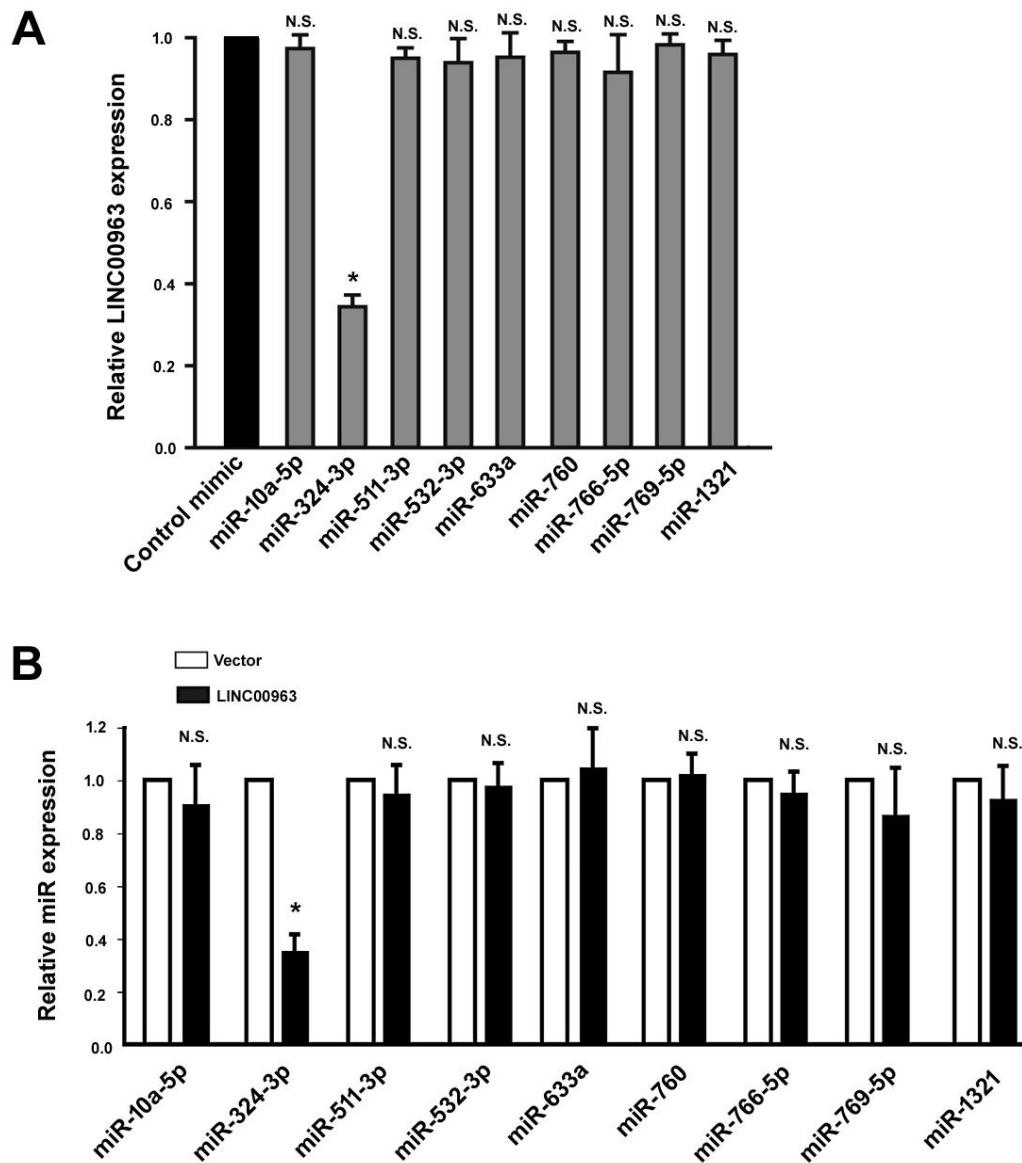

Supplementary Figure S1. LINC00963 antagonizes miR-324-3p in breast cancer cells.

(A) MCF-7 cells were transfected with miR or control mimics and tested for LINC00963 expression. \* $P < 0.05$  vs. control mimic. N.S. indicates no significance.

(B) MCF-7 cells were transfected with LINC00963-expressing plasmid or empty vector and tested for the expression of indicated miRs. \* $P < 0.05$  vs. empty vector. N.S.

indicates no significance.

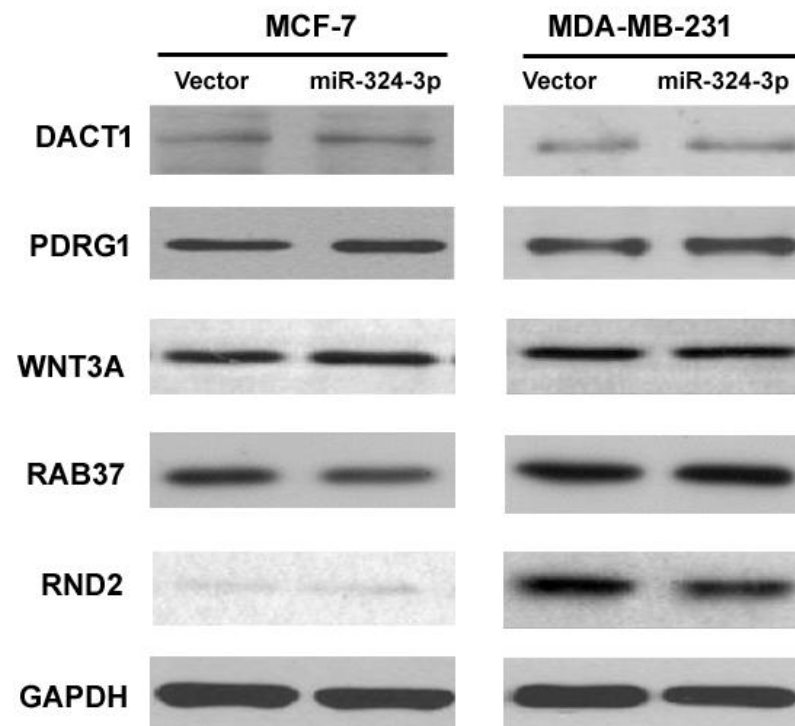

Supplementary Figure S2. Effects of miR-324-3p overexpression on the expression of indicated proteins. Both MCF-7 and MDA-MB-231 cells were transfected with miR-324-3p-expressing plasmid or empty vector and tested for the expression of indicated proteins.
